# Supplementary material
Source: publisher figshare collection journal article supplement (https://adisjournals.figshare.com/ndownloader/files/40452998)
Supplement: Supplementary file 1 [file 40452998]

## Olipudase Alfa: Adis Evaluation

### Clinical Considerations

- **First and currently the only disease-modifying therapy**
- **Improves lung function, reduces liver and spleen volume, and increases platelet counts; efficacy sustained through at least 2 years of treatment**
- **Generally well tolerated**

### Plain Language Summary

#### *Background and rationale*

- Sphingomyelin, a fatty substance found in mammalian cell membranes, is broken down by the enzyme acid sphingomyelinase in healthy individuals.
- Acid sphingomyelinase deficiency (ASMD) is a rare inherited genetic disorder, in which the patient's body does not produce enough of the acid sphingomyelinase enzyme, leading to accumulation of sphingomyelin in major organs such as lungs, liver and spleen.
- ASMD types A and A/B (but not type B) also involve brain cells.
- Olipudase alfa (Xenpozyme™) is an enzyme replacement therapy indicated to treat non-CNS manifestations of ASMD in adult and paediatric patients.

#### *Clinical findings*

- By reducing sphingomyelin accumulation, olipudase alfa improves lung function, reduces liver and spleen volume, and increases platelet counts, while also correcting other ASMD-related dysfunctions. These benefits are sustained through at least 24 months of treatment.
- Olipudase alfa is generally well tolerated.

#### *Conclusion*

Olipudase alfa is the first and currently the only disease-modifying treatment for ASMD.

This plain language summary represents the opinions of the author. For a full list of declarations, including funding and author disclosure statements, and copyright information, please see the full text online. © Springer Nature Switzerland AG 2023.
